# Supplementary material for: Cumulative Exposure to Opioids and Benzodiazepines in Extremely Preterm Neonates
Source: Research Square preprint supplement (doi:10.21203/rs.3.rs-7105002/v1), 2025-07-18
Supplement: Supplementary file 1 [file 2380830535f08a9e211fecf7.docx]

| **Supplemental Table 1: Facility Characteristics** | | | | | | | |
| --- | --- | --- | --- | --- | --- | --- | --- |
|  | **Facility** | | | | | | |
|  | A | B | C | D | E | F | G |
| Type | Level III Community | Level III Regional | Level III Regional | Level III Regional | Level III Community | Level III Community | Level III Community |
| Surgery | No | Yes | Yes | Yes | Yes | No | No |
| Residency Program | No | Yes | No | No | Yes | No | No |
| NICU admissions/year | 250-300 | 350-400 | 900-950 | 350-400 | 350-400 | 400-450 | 350-400 |

| **Supplemental Table 2: Facility Patient Characteristics** | | | | | | | |
| --- | --- | --- | --- | --- | --- | --- | --- |
|  | **Facility** | | | | | | |
|  | A | B | C | D | E | F | G |
| GA 23-24 weeks | 18.3% | 11.8% | 17.5% | 11.1% | 8.7% | 13% | 18.3% |
| Antenatal Steroids | 96% | 96% | 96% | 95% | 93% | 91% | 96% |
| SGA (<10th%) | 4% | 10% | 11% | 11% | 10% | 12% | 4% |
| Mechanical Ventilation | 38% | 66% | 61% | 45% | 59% | 66% | 38% |
| Any Bacterial Infection | 10% | 15% | 12% | 6% | 12% | 12% | 10% |
| NEC | 5.3% | 8.5% | 4.0% | 6.9% | 2.2% | 3.4% | 5.3% |
| Severe ROP | 7% | 11% | 13% | 7% | 8% | 14% | 7% |
| Severe IVH | 10% | 8% | 7% | 4% | 5% | 6% | 10% |

GA – gestational age; SGA – small for gestational age; NEC – necrotizing enterocolitis; ROP – retinopathy of prematurity; IVH – intraventricular hemorrhage
